# Supplementary material for: Inhibition of Filamin-A Reduces Cancer Metastatic Potential
Source: PubMed Central journal article supplement — Int J Biol Sci. 2012 Dec 21;9(1):67–77. doi: 10.7150/ijbs.5577 (PMC3535535; doi:10.7150/ijbs.5577), 2012-12-21
Supplement: ijbsv09p0067s1.pdf [file ijbsv09p0067s1.pdf]

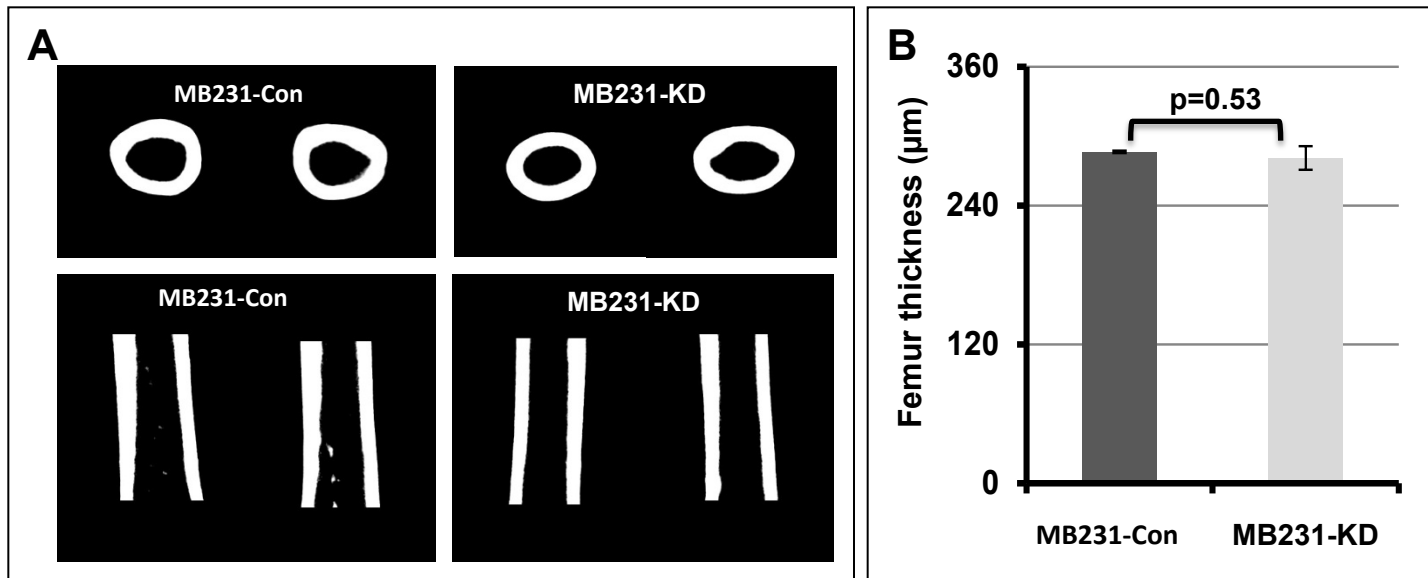

Figure S1. Similar cortical wall thickness observed in the femurs away from growth plate in nude mice inoculated with tumor cells.
